# Supplementary material
Source: ML conference proceedings conference paper supplement (https://proceedings.mlr.press/v38/kurras15.html)
Supplement: Supplementary file [file kurras15-supp.pdf]

---

# Symmetric Iterative Proportional Fitting

## — Supplementary Material —

---

This supplement consists of several parts that refer directly to specific topics in the paper:

- A - Proof of Equation (2)
- B - Proof of Lemma 3.1 (Symmetric biproportional fit)
- C - Technical details on why "local affinity" is sufficient in Section 4.1
- D - Proof of Theorem 4.2 (Convergence of PSIPF)
- E - Proof of Lemma 4.4 ( $L_1$ -monotony)
- F - Proof of Lemma 4.5 (Volume bounds)
- G - Proof of Lemma 4.6 (Limit points)
- H - Proof of Lemma 4.7 (Strong convergence)
- I - Proof (sketch) of Proposition 5.2 (Strictly positive feasibility)

### A Proof of Equation (2)

Equation (2) claims that for all  $A, W \in \Omega$  with  $E(A) \subseteq E(W)$ ,  $\mathbf{r} \in \mathbb{R}_{>0}^m$ , and  $\mathcal{R} := \Omega(\mathbf{r}, \cdot, W)$ , it holds that  $\mathcal{P}_{\mathcal{R}}(A) = \text{diag}(\mathbf{r}) \cdot \text{diag}(A\mathbf{1})^{-1} \cdot A$ . In order to keep notation simple, we first prove the following weaker statement (by assuming  $A = W$ ) and finally generalize the result to any  $A$  with  $E(A) \subseteq E(W)$

For  $W \in \Omega$ ,  $\mathbf{r} \in \mathbb{R}_{>0}^m$  and  $\mathcal{R} := \Omega(\mathbf{r}, \cdot, W) = \{X \in \mathbb{R}_{\geq 0}^{m \times n} \mid X\mathbf{1} = \mathbf{r}, E(X) \subseteq E(W)\}$  it holds that

$$\mathcal{P}_{\mathcal{R}}(W) = \text{diag}(\mathbf{r}) \text{diag}(W\mathbf{1})^{-1} \cdot W$$

*Proof.* From  $w_{ij} = 0 \Rightarrow x_{ij} = 0$  and  $0 \cdot \log(0/w_{ij}) := 0$  it follows by definition of  $RE$  that

$$\varrho(X) := RE(X\|W) = \sum_{\substack{i=1 \dots m, \\ j=1 \dots n}} x_{ij} \log(x_{ij}/w_{ij}) - x_{ij} + w_{ij} = \sum_{ij \in E(W)} x_{ij} \log(x_{ij}/w_{ij}) - x_{ij} + w_{ij}$$

From the definitions we get that

$$\begin{aligned} \mathcal{P}_{\mathcal{R}}(W) &= \arg \min_{X \in \mathbb{R}_{\geq 0}^{m \times n}} \{ \varrho(X) \mid X\mathbf{1} = \mathbf{r}, E(X) \subseteq E(W) \} \\ &= \arg \min_{X \in \mathbb{R}_{\geq 0}^{m \times n}} \left\{ \sum_{ij \in E(W)} x_{ij} \log(x_{ij}/w_{ij}) - x_{ij} \mid X\mathbf{1} = \mathbf{r}, E(X) \subseteq E(W) \right\}. \end{aligned} \quad (\star)$$

It follows from strict convexity of  $\varrho$  and convexity of the constraints that the minimizer is unique, if existing ( $\ast$ ).

*Comment:* Note that ( $\star$ ) describes a non-smooth optimization problem because the partial derivative " $\nabla_{X_{ij}} \varrho(X) = \log(x_{ij}/w_{ij})$ ", does not exist whenever  $ij \in E(W) \setminus E(X)$ . A general strategy to avoid this problem is by first determining  $E(\mathcal{P}_{\mathcal{R}}(W))$  separately and then skipping all summands with  $ij \notin E(\mathcal{P}_{\mathcal{R}}(W))$  from ( $\star$ ), before finally taking the Lagrangian approach. For the projection to  $\mathcal{R}$  we show in the following that  $E(\mathcal{P}_{\mathcal{R}}(W)) = E(W)$ .

We re-state  $(\star)$  as the minimization over  $2^{|E(W)|}$  many individual minimization problems, one for each  $E \subseteq E(W)$ , and each providing a unique (if existing) “inner minimizer”  $R^*(E)$  that achieves its respective minimum  $\varrho^*(E)$ :

$$\mathcal{P}_{\mathcal{R}}(W) = R^*(E^*) \quad \text{for} \quad E^* := \arg \min_{E \subseteq E(W)} \{\varrho^*(E)\}$$

$$\text{and} \quad \varrho^*(E) := \begin{cases} \min_{X \in \mathbb{R}_{\geq 0}^{m \times n}} \{\varrho(X) \mid X\mathbf{1} = \mathbf{r}, E(X) = E\} & \text{with unique minimizer } R^*(E) \\ \infty & \text{if not existing} \end{cases}.$$

If  $\mathcal{P}_{\mathcal{R}}(W)$  exists, then  $E^*$  is well-defined because at least one inner minimizer exists: for  $E = E(\mathcal{P}_{\mathcal{R}}(W))$  there trivially exists  $R^*(E) = \mathcal{P}_{\mathcal{R}}(W)$ . We now show that further  $E^*$  is maximal in the sense that  $E(\mathcal{P}_{\mathcal{R}}(W)) \supseteq E$  for all  $E \subseteq E(W)$  for which  $R^*(E)$  exists.

For any  $E_1, E_2 \subseteq E(W)$  for which  $R^*(E_1)$  and  $R^*(E_2)$  exist let  $R_\alpha := \alpha R^*(E_1) + (1 - \alpha)R^*(E_2)$  denote their convex combination for  $\alpha \in (0, 1)$ . Then  $E(R_\alpha) = E_1 \cup E_2 =: E_{12}$ . In particular  $E_{12} \neq \emptyset$ , thus  $R^*(E_{12})$  exists. By continuity of  $\varrho$  we get that  $\lim_{\alpha \rightarrow 0} \varrho(R_\alpha) = \varrho(R^*(E_1)) = \varrho^*(E_1)$  and similarly that  $\lim_{\alpha \rightarrow 1} \varrho(R_\alpha) = \varrho(R^*(E_2)) = \varrho^*(E_2)$ . Since further  $\varrho^*(E_{12}) \leq \varrho(R_\alpha)$  we get that  $\varrho^*(E_{12}) \leq \min\{\varrho^*(E_1), \varrho^*(E_2)\}$ . Thus  $\varrho^*$  cannot increase when considering the union of any two sets. This implies that with  $\xi := \{E \subseteq E(W) \mid \varrho^*(E) < \infty\}$  and  $E^* := \bigcup_{E \in \xi} E$  that  $\varrho^*(E^*) \leq \varrho^*(E)$  for all  $E \subseteq E(W)$ . Hence  $R^*(E^*)$  must be *some* global minimizer. It is further unique over all subsets  $E \subseteq E(W)$  by the separate uniqueness argument  $(\ast)$  above. Hence  $\mathcal{P}_{\mathcal{R}}(W) = R^*(E^*)$ .

Here, we even get that  $E^* = E(W)$  because there exists the feasible solution

$$W^* := \text{diag}(\mathbf{r}) \text{diag}(W\mathbf{1})^{-1} \cdot W$$

of maximum possible non-zeros  $E(W^*) = E(W)$ . It remains to show that  $\mathcal{P}_{\mathcal{R}}(W)$  indeed equals  $W^*$ .

With the knowledge that  $E(\mathcal{P}_{\mathcal{R}}(W)) = E(W)$  we can re-state the minimization problem  $(\star)$  as

$$\mathcal{P}_{\mathcal{R}}(X) = \arg \min_{X \in \mathbb{R}_{\geq 0}^{m \times n}} \left\{ \sum_{ij \in E(W)} x_{ij} \log(x_{ij}/w_{ij}) - x_{ij} \mid X\mathbf{1} = \mathbf{r}, E(X) = E(W) \right\}.$$

Now we can take the standard Lagrangian approach, that is to find a global minimum of the Lagrangian function

$$\Lambda(X, \boldsymbol{\mu}) = \varrho(X) - \boldsymbol{\mu}^T (X\mathbf{1} - \mathbf{r}) = \sum_{ij \in E(W)} x_{ij} \log(x_{ij}/w_{ij}) - x_{ij} - \sum_{i=1}^m \mu_i \left( \sum_{j \text{ s.t. } ij \in E(W)} x_{ij} - r_i \right)$$

over  $X \in \mathbb{R}_{> 0}^{E(W)}$ , by which we handle  $x_{ij} := 0$  for all  $ij \notin E(W)$  as constants. From  $w_{ij} \neq 0 \Leftrightarrow x_{ij} \neq 0$  we get that  $\nabla_{x_{ij}} \Lambda(X, \boldsymbol{\mu}) = \log(x_{ij}/w_{ij}) - \mu_i$  for all  $ij \in E(W)$ . Setting all derivatives to zero gives after entry-wise exponentiation that

$$x_{ij} = \begin{cases} \exp(\mu_i) \cdot w_{ij} & \text{for } ij \in E(W) \\ 0 & \text{for } ij \notin E(W) \end{cases},$$

that is in matrix notation  $X = \text{diag}(\exp(\boldsymbol{\mu})) \cdot W$ . Multiplying  $\mathbf{1}$  from the right gives that  $\mathbf{r} = X\mathbf{1} = \text{diag}(\exp(\boldsymbol{\mu})) \cdot W\mathbf{1}$ , hence  $\text{diag}(\exp(\boldsymbol{\mu})) = \text{diag}(\mathbf{r}) \text{diag}(W\mathbf{1})^{-1}$ . Thus  $X = W^*$  is indeed the (only) critical point. Further, the Hessian matrix is the diagonal matrix with the all-positive diagonal  $\nabla_{x_{ij}} \nabla_{x_{ij}} \Lambda(X, \boldsymbol{\mu}) = 1/x_{ij}$ , which is positive definite. Thus  $W^*$  is the (unique global) minimum. □

The proof easily generalizes to  $\mathcal{P}_{\mathcal{R}}(A)$  for any  $A \in \Omega$  with  $E(A) = E(W)$  just by flipping the notation from  $W = [w_{ij}]$  to  $A = [a_{ij}]$  whenever  $W$  appears as the argument of  $\mathcal{P}_{\mathcal{R}}(\cdot)$ . Further, it generalizes to any  $A \in \Omega$  with  $E(A) \subseteq E(W)$  by the convention  $x_{ij} \cdot \log(x_{ij}/0) := \infty$  for  $x_{ij} > 0$ , which immediately implies that  $E(\mathcal{P}_{\mathcal{R}}(A)) \subseteq E(A)$ , hence by maximality  $E(\mathcal{P}_{\mathcal{R}}(A)) = E(A)$ .

The proof for  $\mathcal{P}_{\mathcal{C}}(W)$  is fully analogous.

## B Proof of Lemma 3.1

**Lemma 3.1 (Symmetric biproportional fits).** *Let  $B$  denote the biproportional fit of  $W \in \mathcal{S}$  to row and column marginals  $\mathbf{f} \in \mathbb{R}_{>0}^n$ . Then*

(i)  $B = B^T$  is symmetric

(ii)  $B = \lim_{k \rightarrow \infty} W_k$  for a sequence of  $W_k \in \Psi(W)$

(iii)  $B \in \Psi(W)$  if and only if  $B$  is direct

*Proof.* (i) Let  $B = \lim_{k \rightarrow \infty} R^{(k)} W S^{(k)}$  denote the biproportional fit of  $W$  to  $\mathbf{f}$ . Then  $B = \lim_{k \rightarrow \infty} R^{(k)} W^T S^{(k)}$  is the same biproportional fit of  $W^T = W$  to  $\mathbf{f}$ . Hence  $B^T = \lim_{k \rightarrow \infty} S^{(k)} W R^{(k)}$  is another biproportional fit of  $W$  to  $\mathbf{f}$ , so by uniqueness,  $B^T = B$ .

(ii) Now define  $T^{(k)} := \sqrt{R^{(k)} S^{(k)}}$  by its diagonal elements  $t_i := (r_i^{(k)} s_i^{(k)})^{1/2}$ . For all  $i, j$  with  $w_{ij} = w_{ji} \neq 0$ , we get from  $\lim_{k \rightarrow \infty} w_{ij} r_i^{(k)} s_j^{(k)} = b_{ij} = b_{ji} = \lim_{k \rightarrow \infty} w_{ij} r_j^{(k)} s_i^{(k)}$  that  $\lim_{k \rightarrow \infty} (r_i^{(k)} s_j^{(k)})^{1/2} = \lim_{k \rightarrow \infty} (r_j^{(k)} s_i^{(k)})^{1/2}$ . Hence,

$$\lim_{k \rightarrow \infty} w_{ij} t_i^{(k)} t_j^{(k)} = \lim_{k \rightarrow \infty} w_{ij} (r_i^{(k)} s_j^{(k)} r_j^{(k)} s_i^{(k)})^{1/2} = w_{ij} \cdot \left( \lim_{k \rightarrow \infty} \sqrt{r_i^{(k)} s_j^{(k)}} \right)^2 = \lim_{k \rightarrow \infty} w_{ij} r_i^{(k)} s_j^{(k)} = b_{ij}.$$

For  $b_{ij} \neq 0$  this implies with  $b_{ij} \neq 0 \Rightarrow w_{ij} \neq 0$  that  $\lim_{k \rightarrow \infty} w_{ij} t_i^{(k)} t_j^{(k)} = b_{ij}$ . If  $b_{ij} = 0$ , then either  $w_{ij} \neq 0$ , thus again  $\lim_{k \rightarrow \infty} w_{ij} t_i^{(k)} t_j^{(k)} = b_{ij}$ , or  $w_{ij} = 0$ , in which case  $\lim_{k \rightarrow \infty} w_{ij} t_i^{(k)} t_j^{(k)} = \lim_{k \rightarrow \infty} 0 t_i^{(k)} t_j^{(k)} = 0 = b_{ij}$ .

Thus,  $\lim_{k \rightarrow \infty} T^{(k)} W T^{(k)} = B$ , which proves (ii) for  $W_k := T^{(k)} W T^{(k)} \in \Psi(W)$ .

(iii) The implication “ $\Rightarrow$ ” follows from the definitions, so it remains to show “ $\Leftarrow$ ”. In case of direct  $B = RWS$ , we get from (ii) with  $T^{(k)} := T := \sqrt{RS}$  that  $B = TWT \in \Psi(W)$ .  $\square$

## C Technical details on why ”local affinity” is sufficient in Section 4.1

In this section we refer to the recursion (4) as the non-reflected sequence  $(\tilde{x}_k)$  defined for some  $\tilde{x}_0 \in \mathbb{R}^N$  by

$$\tilde{x}_k := \mathcal{P}_{[k]}(\tilde{x}_{k-1}) \quad ,$$

and to the recursion (5) as the sequence  $(x_k)$  defined for  $x_0 = \tilde{x}_0$  by

$$x_k := (\mathcal{P}_{[k]}^h \circ \nabla h^*)(\nabla h(x_{k-1}) + r_{k-\ell})$$

$$\text{and } r_k := \nabla h(x_{k-1}) + r_{k-\ell} - \nabla h(x_k) \quad .$$

We say that a function  $h : \mathbb{R}^N \rightarrow \mathbb{R}$  is “suitable”, if it is Legendre, co-finite, and very strictly convex. Please refer to B&L (Bauschke and Lewis, 2000) for detailed definitions. Beside others, orthogonal projections and  $RE$ -projections are induced by a suitable function  $h$  as a Bregman divergence, so all results hold for both of them.

In the following,  $\langle \cdot, \cdot \rangle$  denotes an inner product on  $\mathbb{R}^N$ . For any  $A \subseteq \mathbb{R}^N$  let  $\mathcal{B}_A(x_0, \epsilon) := \{x \in A \mid \|x - x_0\|_2 \leq \epsilon\}$  denote the ball of radius  $\epsilon$  around  $x_0$  in  $A$ . For any subset  $\mathcal{C}$  of an affine subspace  $\mathcal{A}$  we denote  $c \in \mathcal{C}$  as being *locally affine* if there exists  $\epsilon > 0$  such that  $\mathcal{B}_A(c, \epsilon) \subseteq \mathcal{C}$ . The sequence (4) is locally affine if all its points for  $k \geq 1$  are locally affine.

All that we need, and which is implied by local affinity, is sloppy spoken that there “exists a basis of  $\mathcal{A}$  and its negate within a small neighborhood in  $\mathcal{C}$  around the point  $c$ ”. Let us give some intuition on what this means and why this can be helpful: if for a linear subspace  $\mathcal{L} \subseteq \mathbb{R}^N$  and some  $q \in \mathbb{R}^N$  it holds that  $\langle x, q \rangle \leq 0$  for all  $x \in \mathcal{L}$  then it follows that  $\langle x, q \rangle = 0$ . This is easy to see from  $\langle b, q \rangle \leq 0$  and  $\langle -b, q \rangle \leq 0$  for every basis vector  $b$  of  $\mathcal{L}$ . It is already sufficient if the inequality holds everywhere within an arbitrary small ball around  $\mathbf{0}$ , since it already contains a smaller-scaled basis of  $\mathcal{L}$ . This insight is stated in the following lemma more general by taking  $\mathcal{L}$  as the difference space of an affine subspace  $\mathcal{A} \subseteq \mathbb{R}^N$ .

**Lemma C.1.** *Let  $\mathcal{A} \subseteq \mathbb{R}^N$  denote an affine subspace. Then it holds for all  $q \in \mathbb{R}^N$  and  $a \in \mathcal{A}$ :*

$$\forall x \in \mathcal{A} : \langle x - a, q \rangle = 0 \quad \Leftrightarrow \quad \exists \epsilon > 0 : \forall x \in \mathcal{B}_{\mathcal{A}}(a, \epsilon) : \langle x - a, q \rangle \leq 0.$$

*The same holds true for  $\geq$  instead of  $\leq$ .*

*Proof.* The direction " $\Rightarrow$ " is trivial, so we only have to prove " $\Leftarrow$ ": let  $\mathcal{L}$  denote the linear subspace that underlies  $\mathcal{A}$ , thus,  $\forall x \in \mathcal{A} : a - x \in \mathcal{L}$ . Let  $b_1, \dots, b_c$  denote a basis of  $\mathcal{L}$ . With  $b'_i := \epsilon \cdot b_i / (\max_i \{\|b_i\|\})$  for  $i = 1, \dots, c$  we get that  $b'_1, \dots, b'_c$  is also a basis of  $\mathcal{L}$ , and that  $a \pm b'_i \in \mathcal{B}_{\mathcal{A}}(a, \epsilon)$ . Thus,  $\langle b'_i, q \rangle \leq 0$  and  $\langle -b'_i, q \rangle \leq 0$ , which implies that  $\langle b'_i, q \rangle = 0$  for all  $i$ . Thus, we get for all  $x \in \mathcal{A}$  from the representation  $x = a + \sum_{i=1}^c \alpha_i b'_i$  for some  $\alpha_1, \dots, \alpha_c \in \mathbb{R}$  that  $\langle x - a, q \rangle = \sum_{i=1}^c \alpha_i \langle b'_i, q \rangle = 0$ .  $\square$

Note that this lemma does *not* state that  $q \perp x$  for  $x \in \mathcal{A}$ . The orthogonality refers to the difference space, that is  $q \perp (x - a) \in \mathcal{L}$ . Lemma C.1 is the tool that we need in order to generalize B&L (Theorem 4.3) to local affinity, as formulated in the following theorem.

**Theorem C.2 (Convergence of locally affine sequences).** *Let  $\mathcal{F} = \mathcal{C}_1 \cap \dots \cap \mathcal{C}_\ell$  be the non-empty intersection of  $\ell$  closed convex sets  $\mathcal{C}_i \subseteq \mathbb{R}^N$ , where each  $\mathcal{C}_i$  is a subset of an affine subspace  $\mathcal{A}_i \subseteq \mathbb{R}^N$ . For  $\tilde{x}_0 \in \mathbb{R}^N$  consider the recursion*

$$\tilde{x}_k := \mathcal{P}_{[k]}^h(\tilde{x}_{k-1})$$

*for  $k \geq 1$ . If the sequence  $(\tilde{x}_0, \tilde{x}_1, \dots)$  is locally affine, then  $\lim_{k \rightarrow \infty} \tilde{x}_k = P_{\mathcal{F}}^h(\tilde{x}_0)$ .*

*Proof.* The proof shows by induction that  $x_k = \tilde{x}_k$  for all  $k \geq 0$ . Then  $\lim_{k \rightarrow \infty} \tilde{x}_k = P_{\mathcal{F}}^h(\tilde{x}_0)$  follows from the fact that it is also the limit of  $(x_k)$ . For all  $k \leq \ell$  it holds that  $x_k = \tilde{x}_k$  because  $r_{k-\ell} = 0$  by definition, and  $\nabla h^* \circ \nabla h = \text{id}$ . Now fix  $k > \ell$  with by induction  $x_i = \tilde{x}_i$  for all  $i < k$ . Note that  $\mathcal{C}_{[k]} = \mathcal{C}_{[k-\ell]}$  and  $\mathcal{A}_{[k]} = \mathcal{A}_{[k-\ell]}$ . Now we incorporate our local affinity assumption. Hence there exists some  $\epsilon_{k-\ell} > 0$  such that  $\mathcal{B}_{\mathcal{A}_{[k]}}(\tilde{x}_{k-\ell}, \epsilon_{k-\ell}) \subseteq \mathcal{C}_{[k]}$ . Because of  $x_{k-\ell} = \tilde{x}_{k-\ell}$  we have that  $\mathcal{B}_{\mathcal{A}_{[k]}}(x_{k-\ell}, \epsilon_{k-\ell}) \subseteq \mathcal{C}_{[k]}$ . From B&L (Equation 1 in Theorem 3.2) we get that for all  $c \in \mathcal{C}_{[k]}$  it holds that  $\langle c - x_{k-\ell}, r_{k-\ell} \rangle \leq 0$ . So we can apply Lemma C.1 in order to get that  $\langle a - x_{k-\ell}, r_k \rangle = 0$  for all  $a \in \mathcal{A}_{[k]}$ . For the underlying difference space  $\mathcal{L}_{[k]} = \mathcal{A}_{[k]} - x_{k-\ell}$  we are free to choose any other element  $z \in \mathcal{A}_{[k]}$  for its representation, that is  $\mathcal{A}_{[k]} - x_{k-\ell} = \mathcal{A}_{[k]} - z$ . Choosing  $z = x_k$  gives that  $\langle a - x_k, r_k \rangle = 0$  for all  $a \in \mathcal{A}_{[k]} \supseteq \mathcal{C}_{[k]}$ . The remaining part follows the ideas of the original proof, but we also fix a small flaw in it. We have that  $x_{k-1} = \tilde{x}_{k-1}$ , and we claim that

$$\tilde{x}_k = \mathcal{P}_{[k]}^h(\tilde{x}_{k-1}) \stackrel{!}{=} (\mathcal{P}_{[k]}^h \circ \nabla h^*)(\nabla h(x_{k-1}) + r_{k-\ell}) = x_k. \quad (\star)$$

Applying the characterization

$$a' = \mathcal{P}_{[k]}^h(a) \Leftrightarrow \forall c \in \mathcal{C}_{[k]} : \langle c - a', \nabla h(a) - \nabla h(a') \rangle \leq 0 \quad (\ast)$$

for  $a := \nabla h^*(\nabla h(x_{k-1}) + r_{k-\ell})$  and corresponding<sup>1</sup>  $a' := x_k$  in the direction of " $\Rightarrow$ " to the right side in  $(\star)$  gives:

$$\begin{aligned} 0 &\geq \langle c - x_k, \nabla h(\nabla h^*(\nabla h(x_{k-1}) + r_{k-\ell})) - \nabla h(x_k) \rangle \\ &= \langle c - x_k, \nabla h(x_{k-1}) + r_{k-\ell} - \nabla h(x_k) \rangle \\ &= \langle c - x_k, \nabla h(\tilde{x}_{k-1}) - \nabla h(x_k) \rangle + \langle c - x_k, r_{k-\ell} \rangle \\ &= \langle c - x_k, \nabla h(\tilde{x}_{k-1}) - \nabla h(x_k) \rangle \end{aligned} \quad \left| \begin{array}{l} \nabla h \circ \nabla h^* = \text{id} \\ x_{k-1} = \tilde{x}_{k-1} \\ \langle c - x_k, r_{k-\ell} \rangle = 0 \end{array} \right.$$

From  $(\ast)$  again, now for  $a := \tilde{x}_{k-1}$  and  $a' = x_k$  in direction " $\Leftarrow$ ", we get that  $x_k = \mathcal{P}_{[k]}^h(\tilde{x}_{k-1})$ , hence  $\tilde{x}_k = x_k$ .

Thus, we can simply drop all reflection terms without affecting the sequence *at all*, nor its limit. Hence in this case the sequence generated by (5) coincides with (4).  $\square$

Note that this theorem can be formulated in more generality by allowing to drop the reflection terms for individual  $\mathcal{C}_i$ 's: for any  $i \in \{1, \dots, \ell\}$  such that  $x_k$  is locally affine for all  $[k] = i$ , we can drop all reflection terms  $r_k$  for  $[k] = i$ , while keeping all other required reflection terms. This does not affect the sequence at all.

<sup>1</sup>here is a small flaw in B&L: they apply  $a$  together with  $a' = \tilde{x}_k$  and later refer to  $\langle c - \tilde{x}_k, r_{k-\ell} \rangle = 0$ . However, it must be  $a' = x_k$  and the orthogonality must be shifted to  $\langle c - x_k, r_{k-\ell} \rangle = 0$ .

## D Proof of Theorem 4.2

**Theorem 4.2 (Convergence of PSIPF).** *Let  $W \in \mathcal{S}$  and  $\mathbf{f} \in \mathbb{R}_{>0}^n$  such that  $\mathcal{S}(\mathbf{f}, W) \neq \emptyset$ . Then the PSIPF-sequence  $(W^{\langle\langle k \rangle\rangle})$  converges to  $\mathcal{P}_{\mathcal{S}(\mathbf{f}, W)}(W)$ . Further,  $W^{\langle\langle k \rangle\rangle} \in \Psi(W)$  for all  $k \geq 0$ .*

*Proof.* Let  $B = \lim_{k \rightarrow \infty} W^{(k)} = \lim_{k \rightarrow \infty} Y^{(k)} W Z^{(k)}$  denote the limit of the IPF-sequence. Lemma 3.1 gives that  $B = B^T$ . We have to show that  $\lim_{k \rightarrow \infty} w_{ij}^{\langle\langle k \rangle\rangle} = b_{ij}$  for all  $i, j$ . Whenever  $w_{ij} = w_{ji} \neq 0$ , we get from  $\lim_{k \rightarrow \infty} w_{ij} y_i^{(k)} z_j^{(k)} = b_{ij} = b_{ji} = \lim_{k \rightarrow \infty} w_{ij} y_j^{(k)} z_i^{(k)}$  that  $\lim_{k \rightarrow \infty} (y_i^{(k)} z_j^{(k)})^{1/2} = \lim_{k \rightarrow \infty} (y_j^{(k)} z_i^{(k)})^{1/2}$ . Hence  $\lim_{k \rightarrow \infty} w_{ij}^{\langle\langle k \rangle\rangle} = \lim_{k \rightarrow \infty} w_{ij} (y_i^{(k)} z_j^{(k)} y_j^{(k)} z_i^{(k)})^{1/2} = \lim_{k \rightarrow \infty} w_{ij} y_i^{(k)} z_j^{(k)} = b_{ij}$ . For  $b_{ij} \neq 0$  this implies with  $b_{ij} \neq 0 \Rightarrow w_{ij} \neq 0$  that  $\lim_{k \rightarrow \infty} w_{ij}^{\langle\langle k \rangle\rangle} = b_{ij}$ . Otherwise (i.e.,  $b_{ij} = 0$ ) it either holds that  $w_{ij} \neq 0$ , thus again  $\lim_{k \rightarrow \infty} w_{ij}^{\langle\langle k \rangle\rangle} = b_{ij}$ , or  $w_{ij} = 0$ , in which case  $\lim_{k \rightarrow \infty} w_{ij}^{\langle\langle k \rangle\rangle} = \lim_{k \rightarrow \infty} 0 (y_i^{(k)} z_j^{(k)} y_j^{(k)} z_i^{(k)})^{1/2} = 0 = b_{ij}$ .  $\square$

## E Proof of Lemma 4.4 ( $L_1$ -monotony)

**Lemma 4.4 ( $L_1$ -monotony).** *For any  $W \in \mathcal{S}$  and any mean function  $m$ , the  $m$ -sequence of  $W$  implies that  $\|\mathbf{f} - \mathbf{d}^{(k)}\|_1$  is monotonously decreasing.*

*Proof.* For  $k \geq 0$  we get with  $s_i := f_i/d_i^{(k)}$  that

$$\begin{aligned}
\|\mathbf{f} - \mathbf{d}^{(k+1)}\|_1 &= \sum_i |f_i - d_i^{(k+1)}| \\
&= \sum_i |\sum_j w_{ij}^{(k)} s_i - \sum_j w_{ij}^{(k)} m(s_i, s_j)| \\
&\leq \sum_i \sum_{j>i} w_{ij}^{(k)} (|s_i - m(s_i, s_j)| + |s_j - m(s_j, s_i)|) \\
&\stackrel{(\star)}{=} \sum_i \sum_{j>i} w_{ij}^{(k)} |s_i - s_j| \\
&\leq \sum_i \sum_{j>i} w_{ij}^{(k)} (|s_i - 1| + |s_j - 1|) \\
&\leq \sum_i |s_i - 1| \cdot d_i^{(k)} = \sum_i |f_i - d_i^{(k)}| = \|\mathbf{f} - \mathbf{d}^{(k)}\|_1,
\end{aligned}$$

where equality  $(\star)$  holds true because of  $m(s_i, s_j) = m(s_j, s_i) \in [\min(s_i, s_j), \max(s_i, s_j)]$ .  $\square$

## F Proof of Lemma 4.5 (Volume bounds)

**Lemma 4.5 (Volume bounds).** *For any  $W \in \mathcal{S}$  and any mean function  $m$ , the  $m$ -sequence of  $W$  satisfies for all  $k \geq 1$  that*

$$\begin{aligned}
(i) \quad \|\mathbf{d}^{(k)}\|_1 &\leq \|\mathbf{f}\|_1 \quad \text{if } m \text{ is sub-arithmetic} \\
(ii) \quad \|\mathbf{d}^{(k)}\|_1 &= \|\mathbf{f}\|_1 \quad \text{if } m = m_A \\
(iii) \quad \|\mathbf{d}^{(k)}\|_1 &\geq \|\mathbf{f}\|_1 \quad \text{if } m \text{ is super-arithmetic}
\end{aligned}$$

*If  $m$  is strict in (i) or (iii), then equality holds if and only if  $f_i/d_i^{(k)} = f_j/d_j^{(k)}$  for all  $w_{ij} \neq 0$ .*

*Proof.* (i) For  $k \geq 0$  we get with  $s_i := f_i/d_i^{(k)}$  that

$$\begin{aligned}
\|\mathbf{f}\|_1 - \|\mathbf{d}^{(k+1)}\|_1 &= \sum_i (\sum_j w_{ij}^{(k)} s_i - \sum_j w_{ij}^{(k)} m(s_i, s_j)) \\
&= \sum_i \sum_{j>i} w_{ij}^{(k)} \underbrace{(s_i - m(s_i, s_j) + s_j - m(s_j, s_i))}_{\geq 0}
\end{aligned}$$

where non-negativity of each summand follows from  $x + y - 2m(x, y) \geq x + y - 2(x + y)/2 = 0$   $(\star)$  for sub-arithmetic  $m$ . If  $m$  is strict, then the inequality in  $(\star)$  holds with equality iff  $x = y$ . This implies that

$\|\mathbf{f}\|_1 - \|\mathbf{d}^{(k+1)}\|_1 \geq 0$  holds with equality iff  $s_i = s_j$  whenever  $w_{ij}^{(k)} \neq 0$ , that is  $w_{ij} \neq 0$ . (ii) follows from (i) and the fact that  $(\star)$  always holds with equality for  $m = m_A$ . (iii) equals (i) with all inequalities flipped.  $\square$

## G Proof of Lemma 4.6 (Limit points)

**Lemma 4.6 (Limit points).** *Every  $m$ -sequence is bounded and has at least one limit point  $W^*$ . If  $\|\mathbf{f} - \mathbf{d}^{(k)}\|_1 \rightarrow 0$ , then every limit point  $W^*$  satisfies  $W^*\mathbf{1} = \mathbf{f}$ . If further  $m = m_G$ , then  $W^*$  is the (unique) biproportional fit of  $W$  to row and column marginals  $\mathbf{f}$ , and it holds that  $W^{(k)} \rightarrow W^*$ .*

*Proof.* Lemma 4.4 implies that there exists  $L > 0$  such that  $w_{ij}^{(k)} \leq L$  for all  $i, j, k$ . Hence  $(W^{(k)})$  is bounded and thus has at least one limit point  $W^*$  in compact  $[0, L]^{n \times n}$ . We now show that if  $\|\mathbf{f} - \mathbf{d}^{(k)}\|_1 \rightarrow 0$ , then any limit point  $W^*$  of the  $m$ -sequence satisfies  $W^*\mathbf{1} = \mathbf{f}$ . Let  $(W^{(k_i)})$  denote any subsequence that converges to  $W^*$ . Then  $\|\mathbf{f} - W^*\mathbf{1}\|_1 \leq \|\mathbf{f} - \mathbf{d}^{(k_i)}\|_1 + \|(W^{(k_i)} - W^*)\mathbf{1}\|_1 \rightarrow 0$ . Now assume that  $m = m_G$ . Then  $W^{(k)} = T^{(k)}WT^{(k)}$  for some  $T^{(k)} \in \text{diag}(\mathbb{R}_{>0}^n)$ , which gives that any limit point  $W^*$  is a biproportional scaling of  $W$ , that is  $W^* = \lim_{i \rightarrow \infty} T^{(k_i)}WT^{(k_i)}$  for a subsequence  $(W^{(k_i)})_{i \geq 0}$ . Because of  $W^*\mathbf{1} = \mathbf{f}$  we get that  $W^*$  is unique by the uniqueness of biproportional fits. Finally, any bounded sequence with a single limit point converges to it, hence  $W^{(k)} \rightarrow W^*$ .  $\square$

## H Proof of Lemma 4.7 (Strong convergence)

**Lemma 4.7 (Strong convergence).** *For any  $\mathbf{x} := (x_1, \dots, x_n) \in \mathbb{R}_{>0}^n$ ,  $\mathbf{a} := (a_1, \dots, a_n) \in \mathbb{R}_{>0}^n$  with  $\sum_i x_i \leq \sum_i a_i$  let  $f(\mathbf{x}) := \sum_i a_i \log \frac{a_i}{x_i}$ . Then*

$$f(\mathbf{x}) \geq 0 \text{ with equality iff } \mathbf{x} = \mathbf{a}. \quad (1)$$

*Further, for any sequence  $(\mathbf{x}^{(k)})_{k \geq 0}$  in  $\mathbb{R}_{>0}^n$  with  $\sum_i x_i^{(k)} \leq \sum_i a_i$  it holds that*

$$\lim_{k \rightarrow \infty} f(\mathbf{x}^{(k)}) = 0 \iff \lim_{k \rightarrow \infty} \mathbf{x}^{(k)} = \mathbf{a}. \quad (2)$$

*Proof.* (1) follows from the Bregman divergence  $RE(\mathbf{a}|\mathbf{x}) = \sum_i a_i \log(a_i/x_i) - a_i + x_i \geq 0$ , hence  $\sum_i a_i \log(a_i/x_i) \geq \sum_i a_i - \sum_i x_i \geq 0$  with equality if and only if  $\mathbf{a} = \mathbf{x}$ . We now prove (2). “ $\Leftarrow$ ” follows from continuity of  $f$ , so it remains to show “ $\Rightarrow$ ”. From  $\sum_i x_i^{(k)} \leq \sum_i a_i =: a$  we get that  $x_i^{(k)} \in (0, a]$  for all  $i \in \{1, \dots, n\}$  and  $k \geq 0$ . Compactness of  $[0, a]^n$  implies that all limit points of  $S := (\mathbf{x}^{(k)})$  lie within  $[0, a]^n$ , and that there exists at least one. Let  $\mathbf{c}$  denote a limit point of  $S$  and  $(\mathbf{y}^{(k)})$  a subsequence that converges to  $\mathbf{c}$ . Note that  $\lim_{\epsilon \rightarrow 0} a_i \log(a_i/\epsilon) = \infty$ . Hence we get by  $f(\mathbf{y}^{(k)}) \rightarrow 0$  and by continuity of  $f$  that  $\mathbf{c} \in (0, a]^n$  and  $f(\mathbf{c}) = 0$ . Now (1) implies that  $\mathbf{c} = \mathbf{a}$  is the unique limit point of  $S$ , thus  $\mathbf{x}^{(k)} \rightarrow \mathbf{a}$ .  $\square$

## I Proof (sketch) of Proposition 5.2 (Strictly positive feasibility)

Consider the following specialization of Proposition 5.2 to connected graphs.

**Proposition 5.2 $\star$  (Strictly positive feasibility for connected graphs).** *Let  $\mathcal{G}(W) = (V, E, W)$  denote the graph corresponding to  $W \in \mathcal{S}$ , and assume that it is connected. For any  $\mathbf{f} \in \mathbb{R}_{>0}^n$  there exists a strictly positive solution in  $\mathcal{S}(\mathbf{f}, W)$  if and only if  $\mathcal{G}(W)$  is a weak  $\mathbf{f}$ -expander that is strict for all  $S \notin \{\emptyset, V_1, V_2, V\}$ , with either  $V_1 := V_2 := \emptyset$  if  $\mathcal{G}(W)$  is non-bipartite, or  $V =: V_1 \cup V_2$  the bipartition of  $\mathcal{G}(W)$ .*

It is straightforward to derive Proposition 5.2 from Proposition 5.2 $\star$ , that is to generalize from connected graphs to possibly unconnected graphs, by applying Proposition 5.2 $\star$  to each connected component, and aggregating the exceptional sets that force equality. So it remains to proof Proposition 5.2 $\star$ .

We need some additional notation and concepts for the proof:

For  $i, j \in V$  with  $ij \in E$  we also write  $i \sim j$ . For  $i \in V$  and  $X \subseteq V$  we write  $i \sim X$  if there exists a vertex  $x \in X$  with  $i \sim x$ . Otherwise, if  $i$  is not adjacent to any of the vertices in  $X$ , we write  $i \not\sim X$ . For  $X, Y \subseteq V$  let  $G[X, Y] := \{ij = ji \in E \mid (i, j) \in X \times Y\}$  denote the set of edges connecting some vertex in  $X$  to some vertex in  $Y$ . Thus,  $B \subseteq V$  is an independent set if and only if  $G[B, B] = \emptyset$ . Observe that for all  $X, Y \subseteq V$  it holds that

$$G[X \cup Y, Y] = \emptyset \iff G[X, Y] = G[Y, Y] = \emptyset.$$

For any set  $B \subseteq V$ , we call any disjoint  $\tilde{B} \subseteq V \setminus B$  satisfying  $G[\tilde{B}, B] = \emptyset$  a *non-adjacent opponent* of  $B$ . This also defines their *rest*  $R(B, \tilde{B}) := V \setminus (B \dot{\cup} \tilde{B})$ , which partitions  $V$  into  $V = B \dot{\cup} \tilde{B} \dot{\cup} R(B, \tilde{B})$ . The set  $B^* := \{i \in V \setminus B \mid i \not\sim B\}$  is the (unique) *maximum non-adjacent opponent* of  $B$ . Thus, all vertices from the rest  $R(B, B^*)$  are adjacent to  $B$ . Any other non-adjacent opponent  $\tilde{B}$  of  $B$  satisfies that  $\tilde{B} \subset B^*$ .

Let  $\delta B := \{i \in V \setminus B \mid \exists j \in B : i \sim j\}$  denote the *vertex boundary* of  $B$ . It holds that  $\delta B = N(B) \setminus B$ . Further  $\delta B = N(B)$  if and only if  $B$  is an independent set. For any set  $B$  and its maximum non-adjacent opponent  $B^*$  their rest is  $R(B, B^*) = \delta B$ .

**Proof (sketch) of Proposition 5.2 $\star$ .** We start with Theorem 7 of Behrend (2013), restricted to a connected graph with  $n \geq 2$  vertices. This is equivalent to the tri-partition statement (i) below. We then transform (i) along a sequence of equivalent statements (i)  $\Leftrightarrow$  (ii)  $\Leftrightarrow$  (iii)  $\Leftrightarrow$  (iv)  $\Leftrightarrow$  (v) to the more intuitive statement (v) in terms of  $\mathbf{f}$ -expansion, which is equivalent to Proposition 5.2 $\star$ .

Let  $G = (V, E, W)$  for  $W \in \Omega$  be connected, and  $\mathbf{f} \in \mathbb{R}_{>0}^n$ . Then there exists a strictly positive solution in  $\mathcal{S}(\mathbf{f}, W)$  if and only if any of the following equivalent statements holds:

- (i)  $\sum_{i \in A} f_i \geq \sum_{j \in B} f_j$  for all  $A, \tilde{A}, B$  with  $V = A \dot{\cup} \tilde{A} \dot{\cup} B$  and  $G[\tilde{A} \dot{\cup} B, B] = \emptyset$ , where equality holds if and only if additionally  $G[A, A \dot{\cup} \tilde{A}] = \emptyset$ .
- (ii)  $\sum_{i \in A} f_i \geq \sum_{j \in B} f_j$  for all  $A, \tilde{A}, B$  with  $V = A \dot{\cup} \tilde{A} \dot{\cup} B$  and  $G[\tilde{A} \dot{\cup} B, B] = \emptyset$ , where equality holds if and only if additionally either  $A = B = \emptyset$  or  $(V = A \dot{\cup} B$  and  $G[A, A] = G[B, B] = \emptyset)$ .
- (iii)  $\sum_{i \in A} f_i \geq \sum_{j \in B} f_j$  for all independent sets  $B$ , non-adjacent opponents  $\tilde{B}$  and  $A = R(B, \tilde{B})$ , where equality holds if and only if additionally either  $A = B = \emptyset$  or  $(V = A \dot{\cup} B$  and  $G[A, A] = G[B, B] = \emptyset)$ .
- (iv)  $\sum_{i \in A} f_i \geq \sum_{j \in B} f_j$  for all independent sets  $B$ , and  $A = N(B)$ , where equality holds if and only if additionally either  $A = B = \emptyset$  or  $(V = A \dot{\cup} B$  and  $G[A, A] = G[B, B] = \emptyset)$ .
- (v)  $\sum_{i \in A} f_i \geq \sum_{j \in B} f_j$  for all subsets  $B \subseteq V$ , and  $A = N(B)$ , where equality holds if and only if additionally either  $B = \emptyset$ , or  $B = V$ , or  $(V = A \dot{\cup} B$  and  $G[A, A] = G[B, B] = \emptyset)$ .

Each intermediate step follows more or less straightforward by carefully applying all definitions. □
